# Supplementary material for: Analysis of ergot alkaloid gene expression and ergine levels in different parts of Ipomoea asarifolia
Source: PeerJ. 2025 Jul 15;13:e19692. doi: 10.7717/peerj.19692 (PMC12273697; doi:10.7717/peerj.19692)
Supplement: Supplemental Information 2 [file peerj-13-19692-s002.xls]

## Sheet: Sheet1
ITEM TO CHECK	IMPORTANCE	CHECKLIST	PAGE/LINE NUMBER
EXPERIMENTAL DESIGN
Definition of experimental and control groups	E	No experiment, compared with each plant part	Page 4, Line 99-100
Number within each group	E	Five	Page 4, Line 119-120
Assay carried out by core lab or investigator's lab?	D	NA	NA
Acknowledgement of authors' contributions	D	NA	NA
SAMPLE
Description	E	P	Page 3, Line 93-94
Volume/mass of sample processed	D	0.2 g	NA
Microdissection or macrodissection	E	Macrodissection	NA
Processing procedure	E	P	Page 4, Line 99-102
If frozen - how and how quickly?	E	Frozen at -80°C, on ice during transport	Page 4, Line 101-102
If fixed - with what, how quickly?	E	NA	NA
Sample storage conditions and duration (especially for FFPE samples)	E	Store in -80℃ for 1 week	Page 4, Line 119
NUCLEIC ACID EXTRACTION
Procedure and/or instrumentation	E	Ground sample with liquid nitrogen	Page 4, Line 120-124
Name of kit and details of any modifications	E	CTAB method	Page 4, Line 120-124
Source of additional reagents used	D	NA	NA
Details of DNase or RNAse treatment	E	DNA-free™ DNA Removal Kit (Invitrogen)	Page 4, Line 125-126
Contamination assessment (DNA or RNA)	E	Electrophoresis detection	Page 4, Line 125-126
Nucleic acid quantification	E	Use the ratio of A260/A280 nm	Page 4, Line 125-126
Instrument and method	E	NanoDrop 2,000 Spectro-photometer (Thermo Scientific, MA, USA)	Page 4, Line 125-126
Purity (A260/A280)	D	Informtion is not available	NA
Yield	D	Informtion is not available	NA
RNA integrity method/instrument	E	Use the ratio of A260/A280 nm	Page 4, Line 125-126
RIN/RQI or Cq of 3' and 5' transcripts	E	NA	NA
Electrophoresis traces	D	NA	NA
Inhibition testing (Cq dilutions, spike or other)	E	NA	NA
REVERSE TRANSCRIPTION
Complete reaction conditions	E	Sheet 2	MIQE checklist, Sheet2
Amount of RNA and reaction volume	E	Sheet 2	MIQE checklist, Sheet2
Priming oligonucleotide (if using GSP) and concentration	E	Sheet 2	MIQE checklist, Sheet2
Reverse transcriptase and concentration	E	Sheet 2	MIQE checklist, Sheet2
Temperature and time	E	Sheet 2	MIQE checklist, Sheet2
Manufacturer of reagents and catalogue numbers	D	Sheet 2	MIQE checklist, Sheet2
Cqs with and without RT	D*	DNA-free™ DNA Removal Kit (Invitrogen)	Page 4, Line 125-126
Storage conditions of cDNA	D	-20°C	Page 4, Line 128
qPCR TARGET INFORMATION
If multiplex, efficiency and LOD of each assay.	E	qRT-PCR raw data	qRT-PCR raw data
Sequence accession number	E	Table 1	Table 1
Location of amplicon	D	Sheet 4	MIQE checklist, Sheet4
Amplicon length	E	Table 1	Table 1
In silico specificity screen (BLAST, etc)	E	BLAST	Page 4-5, Line 133-135
Pseudogenes, retropseudogenes or other homologs?	D	NA	NA
Sequence alignment	D	NA	NA
Secondary structure analysis of amplicon	D	NA	NA
Location of each primer by exon or intron (if applicable)	E	NA	NA
What splice variants are targeted?	E	NA	NA
qPCR OLIGONUCLEOTIDES
Primer sequences	E	Table 1	Table 1
RTPrimerDB Identification Number	D	NA	NA
Probe sequences	D**	NA	NA
Location and identity of any modifications	E	NA	NA
Manufacturer of oligonucleotides	D	Macrogen	NA
Purification method	D	Desalt	NA
qPCR PROTOCOL
Complete reaction conditions	E	P	Page 5, Line 135-144; MIQE checklist, Sheet3
Reaction volume and amount of cDNA/DNA	E	Sheet 3	MIQE checklist, Sheet3
Primer, (probe), Mg++ and dNTP concentrations	E	Sheet 3	MIQE checklist, Sheet3
Polymerase identity and concentration	E	Sheet 3	MIQE checklist, Sheet3
Buffer/kit identity and manufacturer	E	Sheet 3	MIQE checklist, Sheet3
Exact chemical constitution of the buffer	D	NA	NA
Additives (SYBR Green I, DMSO, etc.)	E	NA	NA
Manufacturer of plates/tubes and catalog number	D	Sheet 3	MIQE checklist, Sheet3
Complete thermocycling parameters	E	Sheet 3	MIQE checklist, Sheet3
Reaction setup (manual/robotic)	D	Manual	NA
Manufacturer of qPCR instrument	E	Applied Biosystems, CA, USA	Page 5, Line 138-140
qPCR VALIDATION
Evidence of optimisation (from gradients)	D	qRT-PCR raw data	qRT-PCR raw data
Specificity (gel, sequence, melt, or digest)	E	Electrophoresis	NA
For SYBR Green I, Cq of the NTC	E	Undetermined	NA
Standard curves with slope and y-intercept	E	qRT-PCR raw data	qRT-PCR raw data
PCR efficiency calculated from slope	E	qRT-PCR raw data	qRT-PCR raw data
Confidence interval for PCR efficiency or standard error	D	0.95	qRT-PCR raw data
r2 of standard curve	E	qRT-PCR raw data	qRT-PCR raw data
Linear dynamic range	E	qRT-PCR raw data	qRT-PCR raw data
Cq variation at lower limit	E	NA	NA
Confidence intervals throughout range	D	NA	NA
Evidence for limit of detection	E	NA	NA
If multiplex, efficiency and LOD of each assay.	E	NA	NA
DATA ANALYSIS
qPCR analysis program (source, version)	E	7500 Fast Software v2.3	NA
Cq method determination	E	P	Page 5, Line 140-143
Outlier identification and disposition	E	NA	NA
Results of NTCs	E	Undetermined	NA
Justification of number and choice of reference genes	E	P	Page 4-5, Line 131-135; Table 1
Description of normalisation method	E	P	Page 5, Line 165-168
Number and concordance of biological replicates	D	Five	Page 5, Line 138-139
Number and stage (RT or qPCR) of technical replicates	E	Three	Page 5, Line 138-139
Repeatability (intra-assay variation)	E	NA	NA
Reproducibility (inter-assay variation, %CV)	D	NA	NA
Power analysis	D	NA	NA
Statistical methods for result significance	E	P	Page 5, Line 165-168
Software (source, version)	E	R version 4.2.1	Page 5, Line 165
Cq or raw data submission using RDML	D	NA	NA
Table 1. MIQE checklist for authors, reviewers and editors. All essential information (E) must be submitted with the manuscript. Desirable
information (D) should be submitted if available. If using primers obtained from RTPrimerDB, information on qPCR target, oligonucleotides,
protocols and validation is available from that source.
*: Assessing the absence of DNA using a no RT assay is essential when first extracting RNA. Once the sample has been validated as
RDNA-free, inclusion of a no-RT control is desirable, but no longer essential.
**: Disclosure of the probe sequence is highly desirable and strongly encouraged. However, since not all commercial pre-designed assay
vendors provide this information, it cannot be an essential requirement. Use of such assays is advised against.

## Sheet: Sheet2
Reverse transcription
Reactions were prepared on ice
Component	Volume per reaction (µl)
5x iScript Reaction Mix	4
Nuclease-free water	variable
RNA template (100 fg-1 µg total RNA)	variable (100 ng)
Total volume	20
Reaction protocol
Incubate the complete reaction mix in a thermal cycler using the following protocol
Primimg	5 min at 25℃
Reverse transcription	20 min at 46℃
RT inactivation	1 min at 95℃
Optional step	Hold at 4℃
Store cDNA at -20℃
iScriptTM cDNA Synthesis Kit (Bio-Rad, CA, USA)
Catalog #1708890 iScript cDNA Synthesis Kit, 25 x 20 µl reactions
Catalog #1708891 iScript cDNA Synthesis Kit, 100 x 20 µl reactions

## Sheet: Sheet3
qPCR protocol
Reactions were prepared on ice
Component	Volume per reaction (µl)
2X KAPA SYBR Mix	5
10 μM Forward Primer	0.2
10 μM Reverse Primer	0.2
Template cDNA	1 (100 ng)
Nuclease-free water	3.6
Reaction protocol
3 min at 95 ºC
1 min at 94 ºC, 1 min 55 ºC, 1 min 72 ºC x35
7 min 72 ºC
Hold at 4℃
KAPA SYBR® FAST Master Mix (2X) ABI Prism™ (#KK4603)
Hard-Shell® 96-Well PCR Plates, low profile, semi-skirted (#HSL9601)
