# Supplementary material for: Analysis of ergot alkaloid gene expression and ergine levels in different parts of Ipomoea asarifolia
Source: PeerJ. 2025 Jul 15;13:e19692. doi: 10.7717/peerj.19692 (PMC12273697; doi:10.7717/peerj.19692)
Supplement: Supplemental Information 3 [file peerj-13-19692-s003.xlsx]

## Sheet: dmaW gene expression
organ	id	replicate	expression
YL	1	1	11.2119
YL	1	2	11.8445
YL	1	3	10.6096
YL	2	1	15.3615
YL	2	2	14.897
YL	2	3	13.7407
YL	3	1	17.0927
YL	3	2	22.6604
YL	3	3	23.0956
YL	4	1	13.0107
YL	4	2	12.3291
YL	4	3	14.6294
YL	5	1	9.73961
YL	5	2	9.31952
YL	5	3	8.1703
ML	1	1	2.69206
ML	1	2	2.82664
ML	1	3	2.34042
ML	2	1	9.87709
ML	2	2	7.57981
ML	2	3	4.46582
ML	3	1	0.782314
ML	3	2	0.686601
ML	3	3	1.1538
ML	4	1	4.17359
ML	4	2	3.44984
ML	4	3	5.3379
ML	5	1	2.8998
ML	5	2	2.8924
ML	5	3	3.01465
S	1	1	0.254806
S	1	2
S	1	3	0.305177
S	2	1	0.45638
S	2	2	0.442275
S	2	3
S	3	1	0.801593
S	3	2	0.719199
S	3	3	0.941615
S	4	1
S	4	2	0.145613
S	4	3
S	5	1	0.0878456
S	5	2
S	5	3
R	1	1	0.102333
R	1	2	0.125777
R	1	3
R	2	1
R	2	2	0.160029
R	2	3
R	3	1	0.373299
R	3	2
R	3	3	0.525808
R	4	1
R	4	2
R	4	3
R	5	1
R	5	2	0.212472
R	5	3
FB	1	1	6.46188
FB	1	2	6.17188
FB	1	3	6.96796
FB	2	1	5.4276
FB	2	2	5.31606
FB	2	3	5.39521
FB	3	1	4.74589
FB	3	2	4.78032
FB	3	3	3.84748
FB	4	1	3.03242
FB	4	2	2.81669
FB	4	3	3.00742
FB	5	1	2.85485
FB	5	2	2.59522
FB	5	3	2.65278
MF	1	1	1.00921
MF	1	2	0.824746
MF	1	3	0.912341
MF	2	1	1.75594
MF	2	2	1.72503
MF	2	3	1.7187
MF	3	1	2.2011
MF	3	2	2.38733
MF	3	3	2.02736
MF	4	1	1.35285
MF	4	2	1.51465
MF	4	3	1.39557
MF	5	1	0.650841
MF	5	2	0.623528
MF	5	3	0.72
YS	1	1	23.8648
YS	1	2	23.446
YS	1	3	24.2142
YS	2	1	35.0134
YS	2	2	30.1074
YS	2	3	34.4472
YS	3	1	15.6108
YS	3	2	15.357
YS	3	3	15.3892
YS	4	1	18.2586
YS	4	2	19.0112
YS	4	3	19.7019
YS	5	1	17.0043
YS	5	2	16.3368
YS	5	3
MS	1	1	1.25885
MS	1	2	1.27437
MS	1	3	1.30343
MS	2	1	1.1487
MS	2	2	1.10684
MS	2	3	1.03382
MS	3	1	2.36645
MS	3	2	2.3615
MS	3	3	2.66067
MS	4	1	1.71516
MS	4	2	1.53643
MS	4	3
MS	5	1	0.677153
MS	5	2	0.753394
MS	5	3

## Sheet: ergine concentration
organ	replicate	ergine (µg/g)
YL	1	45.89
YL	2	49.769
YL	3	51.258
ML	1	69.71
ML	2	68.073
ML	3	68.397
S	1	3.974
S	2	4.623
S	3	4.623
R	1	3.916
R	2	2.799
R	3	2.873
FB	1	5.333
FB	2	3.531
FB	3	3.626
MF	1	1.878
MF	2	1.566
MF	3	1.693
YS	1	13.481
YS	2	15.384
YS	3	16.853
MS	1	10.852
MS	2	10.621
MS	3	13.652

## Sheet: reference genes expression
organ	id	gene	replicate	expression
YL	1	atp6	1	190.219
YL	1	atp6	2	262.197
YL	1	atp6	3	654.424
ML	1	atp6	1	-32.5863
ML	1	atp6	2	-12.8146
ML	1	atp6	3	-18.5835
S	1	atp6	1	-1.9531
S	1	atp6	2
S	1	atp6	3	-7.3778
R	1	atp6	1	-71.2108
R	1	atp6	2	-47.1396
R	1	atp6	3
FB	1	atp6	1	-1.33032
FB	1	atp6	2	1.47608
FB	1	atp6	3	1.0773
MF	1	atp6	1	2.03139
MF	1	atp6	2	1.82904
MF	1	atp6	3	6.368
YS	1	atp6	1	59.7412
YS	1	atp6	2	79.1103
YS	1	atp6	3	36.2086
MS	1	atp6	1	-24.0848
MS	1	atp6	2	-7.56014
MS	1	atp6	3	-7.68138
YL	1	actG	1	12.5485
YL	1	actG	2	12.9927
YL	1	actG	3	10.9213
ML	1	actG	1	-14.9731
ML	1	actG	2	-19.7898
ML	1	actG	3	-16.5608
S	1	actG	1	-12.162
S	1	actG	2
S	1	actG	3	-29.0228
R	1	actG	1	-3.16165
R	1	actG	2	-3.74689
R	1	actG	3
FB	1	actG	1	-6.77781
FB	1	actG	2	-3.49473
FB	1	actG	3	-27.0369
MF	1	actG	1	-1.18263
MF	1	actG	2	-2.00629
MF	1	actG	3	-1.47262
YS	1	actG	1	-12.4882
YS	1	actG	2	-11.1895
YS	1	actG	3	-13.2512
MS	1	actG	1	-34.4821
MS	1	actG	2
MS	1	actG	3	-9.42876
YL	1	tefA	1	24.7319
YL	1	tefA	2	22.5939
YL	1	tefA	3	36.3303
ML	1	tefA	1	-45.8477
ML	1	tefA	2	-21.6392
ML	1	tefA	3
S	1	tefA	1	-2.0486
S	1	tefA	2
S	1	tefA	3	-8.64557
R	1	tefA	1	-2.86849
R	1	tefA	2	-4.15101
R	1	tefA	3
FB	1	tefA	1	-3.13102
FB	1	tefA	2	-10.5919
FB	1	tefA	3	-10.7905
MF	1	tefA	1	4.08393
MF	1	tefA	2	4.2293
MF	1	tefA	3	5.545
YS	1	tefA	1	107.121
YS	1	tefA	2	98.9692
YS	1	tefA	3	259.627
MS	1	tefA	1	-29.7217
MS	1	tefA	2
MS	1	tefA	3
YL	2	atp6	1	299.898
YL	2	atp6	2	195.597
YL	2	atp6	3	144.421
ML	2	atp6	1	-13.5887
ML	2	atp6	2	-14.1816
ML	2	atp6	3	-7.6002
S	2	atp6	1	-21.5106
S	2	atp6	2	-2.34751
S	2	atp6	3
R	2	atp6	1
R	2	atp6	2
R	2	atp6	3
FB	2	atp6	1	2.71272
FB	2	atp6	2	3.74382
FB	2	atp6	3	-1.2375
MF	2	atp6	1	1.74312
MF	2	atp6	2	-5.37306
MF	2	atp6	3	-4.2633
YS	2	atp6	1	89.0344
YS	2	atp6	2	58.453
YS	2	atp6	3	22.7418
MS	2	atp6	1	-16.7634
MS	2	atp6	2	-17.1097
MS	2	atp6	3	-9.38681
YL	2	actG	1	9.08679
YL	2	actG	2	18.6742
YL	2	actG	3	11.508
ML	2	actG	1	-18.263
ML	2	actG	2	-11.5939
ML	2	actG	3	-9.94982
S	2	actG	1	-15.3563
S	2	actG	2	-4.7891
S	2	actG	3
R	2	actG	1
R	2	actG	2	-6.26751
R	2	actG	3
FB	2	actG	1	-4.06371
FB	2	actG	2	-5.16078
FB	2	actG	3	-16.5546
MF	2	actG	1	1.03832
MF	2	actG	2	-9.35767
MF	2	actG	3	-10.5997
YS	2	actG	1	8.83589
YS	2	actG	2	17.52
YS	2	actG	3	6.82032
MS	2	actG	1
MS	2	actG	2	-48.634
MS	2	actG	3
YL	2	tefA	1	28.9293
YL	2	tefA	2	17.2971
YL	2	tefA	3	24.7148
ML	2	tefA	1	-30.5048
ML	2	tefA	2	-15.4789
ML	2	tefA	3
S	2	tefA	1	-31.7182
S	2	tefA	2	-7.88848
S	2	tefA	3
R	2	tefA	1
R	2	tefA	2	-2.24453
R	2	tefA	3
FB	2	tefA	1	-3.78217
FB	2	tefA	2	-4.23341
FB	2	tefA	3	-2.38243
MF	2	tefA	1	3.3945
MF	2	tefA	2	1.72855
MF	2	tefA	3	4.11218
YS	2	tefA	1	142.71
YS	2	tefA	2	79.0138
YS	2	tefA	3	205.216
MS	2	tefA	1
MS	2	tefA	2	-46.4306
MS	2	tefA	3
YL	3	atp6	1	179.264
YL	3	atp6	2	272.128
YL	3	atp6	3	206.136
ML	3	atp6	1	-24.9137
ML	3	atp6	2	-9.68261
ML	3	atp6	3	-4.8017
S	3	atp6	1	-2.34751
S	3	atp6	2	-21.5106
S	3	atp6	3	-15.887
R	3	atp6	1	-51.2004
R	3	atp6	2
R	3	atp6	3
FB	3	atp6	1	-1.38897
FB	3	atp6	2	9.00154
FB	3	atp6	3	1.94722
MF	3	atp6	1	-6.21626
MF	3	atp6	2	1.05976
MF	3	atp6	3	5.12203
YS	3	atp6	1	70.0877
YS	3	atp6	2	54.2368
YS	3	atp6	3	61.0074
MS	3	atp6	1	-18.6558
MS	3	atp6	2	-32.0841
MS	3	atp6	3	-37.0921
YL	3	actG	1	14.4977
YL	3	actG	2	25.2667
YL	3	actG	3	10.8673
ML	3	actG	1	-14.5465
ML	3	actG	2	-6.70856
ML	3	actG	3	-10.3364
S	3	actG	1	-4.7891
S	3	actG	2	-15.3563
S	3	actG	3	-46.8584
R	3	actG	1	-2.83151
R	3	actG	2
R	3	actG	3	-12.056
FB	3	actG	1	-10.3585
FB	3	actG	2	-9.72317
FB	3	actG	3	-9.20314
MF	3	actG	1	-3.15853
MF	3	actG	2	-6.04635
MF	3	actG	3	-2.78895
YS	3	actG	1	11.7663
YS	3	actG	2	24.9377
YS	3	actG	3	8.15542
MS	3	actG	1	-37.275
MS	3	actG	2
MS	3	actG	3	-22.5046
YL	3	tefA	1	67.7056
YL	3	tefA	2	64.4709
YL	3	tefA	3	63.4196
ML	3	tefA	1	-37.2862
ML	3	tefA	2	-31.4211
ML	3	tefA	3	-13.3253
S	3	tefA	1	-5.98676
S	3	tefA	2	-31.7182
S	3	tefA	3	-66.0531
R	3	tefA	1	-2.28571
R	3	tefA	2
R	3	tefA	3	-5.98379
FB	3	tefA	1	-3.18452
FB	3	tefA	2	-2.29202
FB	3	tefA	3	-4.24175
MF	3	tefA	1	1.56444
MF	3	tefA	2	1.02278
MF	3	tefA	3	2.3434
YS	3	tefA	1	96.1372
YS	3	tefA	2	120.389
YS	3	tefA	3	132.262
MS	3	tefA	1
MS	3	tefA	2
MS	3	tefA	3	-46.0074
YL	4	atp6	1	150.217
YL	4	atp6	2	160.653
YL	4	atp6	3	211.373
ML	4	atp6	1	-24.8541
ML	4	atp6	2	-17.2244
ML	4	atp6	3	-18.521
S	4	atp6	1
S	4	atp6	2	1.81361
S	4	atp6	3
R	4	atp6	1
R	4	atp6	2
R	4	atp6	3
FB	4	atp6	1	-1.16155
FB	4	atp6	2	1.07162
FB	4	atp6	3	-16.7544
MF	4	atp6	1	2.5932
MF	4	atp6	2	-4.00989
MF	4	atp6	3	3.69387
YS	4	atp6	1	460.55
YS	4	atp6	2	27.1591
YS	4	atp6	3	35.7172
MS	4	atp6	1	-23.7071
MS	4	atp6	2	-2.54828
MS	4	atp6	3
YL	4	actG	1	7.80293
YL	4	actG	2	8.14807
YL	4	actG	3	35.4883
ML	4	actG	1	-24.7907
ML	4	actG	2	-13.3404
ML	4	actG	3	-5.87668
S	4	actG	1
S	4	actG	2	-9.07811
S	4	actG	3
R	4	actG	1
R	4	actG	2
R	4	actG	3
FB	4	actG	1	-29.2433
FB	4	actG	2	-2.26893
FB	4	actG	3
MF	4	actG	1	-1.41937
MF	4	actG	2	-9.80157
MF	4	actG	3	-1.08564
YS	4	actG	1	17.1328
YS	4	actG	2	7.63041
YS	4	actG	3	8.0717
MS	4	actG	1
MS	4	actG	2	-120.911
MS	4	actG	3
YL	4	tefA	1	2.44555
YL	4	tefA	2	1.9433
YL	4	tefA	3	28.8771
ML	4	tefA	1	-37.3247
ML	4	tefA	2	-41.7378
ML	4	tefA	3	-46.2517
S	4	tefA	1
S	4	tefA	2	-3.00822
S	4	tefA	3
R	4	tefA	1
R	4	tefA	2
R	4	tefA	3
FB	4	tefA	1	-1.46599
FB	4	tefA	2	-4.27136
FB	4	tefA	3	-45.7088
MF	4	tefA	1	4.03083
MF	4	tefA	2	5.39169
MF	4	tefA	3	18.5838
YS	4	tefA	1	166.934
YS	4	tefA	2	254.566
YS	4	tefA	3	107.149
MS	4	tefA	1
MS	4	tefA	2	-46.913
MS	4	tefA	3
YL	5	atp6	1	777.894
YL	5	atp6	2	629.049
YL	5	atp6	3	304.27
ML	5	atp6	1	-5.13476
ML	5	atp6	2	-1.72796
ML	5	atp6	3	-8.36951
S	5	atp6	1	-2.22631
S	5	atp6	2
S	5	atp6	3
R	5	atp6	1
R	5	atp6	2	-50.6919
R	5	atp6	3
FB	5	atp6	1	1.45611
FB	5	atp6	2	1.10476
FB	5	atp6	3	-1.41361
MF	5	atp6	1	2.66826
MF	5	atp6	2	-3.19165
MF	5	atp6	3	1.5191
YS	5	atp6	1	24.5682
YS	5	atp6	2	6.47632
YS	5	atp6	3
MS	5	atp6	1	-14.3332
MS	5	atp6	2	-4.88095
MS	5	atp6	3
YL	5	actG	1	14.9689
YL	5	actG	2	14.6216
YL	5	actG	3	22.1681
ML	5	actG	1	-45.8643
ML	5	actG	2	-14.2773
ML	5	actG	3	-15.0278
S	5	actG	1	-15.2597
S	5	actG	2
S	5	actG	3
R	5	actG	1
R	5	actG	2	-3.86032
R	5	actG	3
FB	5	actG	1	-6.35224
FB	5	actG	2	-7.74045
FB	5	actG	3	-14.0424
MF	5	actG	1	-1.4247
MF	5	actG	2	-6.27832
MF	5	actG	3	1.19546
YS	5	actG	1	5.70149
YS	5	actG	2	5.81968
YS	5	actG	3
MS	5	actG	1
MS	5	actG	2	-4.80389
MS	5	actG	3
YL	5	tefA	1	14.9645
YL	5	tefA	2	5.44611
YL	5	tefA	3	52.3316
ML	5	tefA	1
ML	5	tefA	2	-1.26147
ML	5	tefA	3
S	5	tefA	1	-6.4773
S	5	tefA	2
S	5	tefA	3
R	5	tefA	1
R	5	tefA	2	-4.07324
R	5	tefA	3
FB	5	tefA	1	-14.2926
FB	5	tefA	2	-13.4494
FB	5	tefA	3	-3.95649
MF	5	tefA	1	4.94046
MF	5	tefA	2	2.97736
MF	5	tefA	3	25.1115
YS	5	tefA	1	103.363
YS	5	tefA	2	12.2187
YS	5	tefA	3
MS	5	tefA	1
MS	5	tefA	2	-107.566
MS	5	tefA	3
