# Supplementary material for: Analysis of ergot alkaloid gene expression and ergine levels in different parts of Ipomoea asarifolia
Source: PeerJ. 2025 Jul 15;13:e19692. doi: 10.7717/peerj.19692 (PMC12273697; doi:10.7717/peerj.19692)
Supplement: Supplemental Information 4 [file peerj-13-19692-s004.xlsx]

## Sheet: qRT-PCR
	Rep1				Rep2				Rep3
	01dmaW	03atp6	05actG	04tefA	01dmaW	03atp6	05actG	04tefA	01dmaW	03atp6	05actG	04tefA
YL1	22.6498	23.8451	27.7672	26.7883	22.4536	23.3821	27.717	26.9187	22.0145	22.0625	27.9675	26.2335
YL2	22.0598	23.1883	28.2328	26.5621	22.2153	23.8049	27.1936	27.3041	22.5315	24.2425	27.892	26.7893
YL3	21.514	23.9307	27.5589	25.3354	20.6681	23.3285	26.7574	25.406	21.1868	23.7292	27.9747	25.4298
YL4	23.8897	24.1857	28.4526	30.1264	24.0231	24.0888	28.3902	30.4581	21.6388	23.693	26.2673	26.5648
YL5	22.334	21.8132	27.5127	27.5131	22.9932	22.1196	27.5466	28.9714	22.2452	23.1674	26.9462	25.707
ML1	34.86	36.4428	35.3209	36.9354	34.0819	35.0963	35.7233	35.8522	34.3227	35.6326	35.4663
ML2	32.3355	35.1809	35.6075	36.3476	32.2657	35.2426	34.9519	35.3688	32.4265	34.3426	34.7313
ML3	36.3981	36.0555	35.2792	36.6372	35.7398	34.692	34.1626	36.3903	34.4386	33.6802	34.7863	35.1527
ML4	34.1573	36.052	36.0483	36.6387	34.0522	35.523	35.1543	36.7999	32.8856	35.6277	33.9716	36.948
ML5	33.0317	33.7769	36.9359		31.8013	32.2057	35.2523	31.7517	33.312	34.4818	35.3262
S1	35.3526	32.3824	35.0209	32.4512					36.8298	34.2998	36.2757	34.5286
S2	37.0765	35.8436	35.3574	36.4038		32.6477	33.6764	34.3964
S3	33.6466	32.6477	33.6764	33.9984		35.8436	35.3574	36.4038	36.4453	35.4064	36.9668	37.4622
S4						30.5577	34.599	33.0055
S5	37.607	32.5713	35.3483	34.112
R1	37.665	37.5706	33.0773	32.9369	36.9107	36.9755	33.3223	33.4701
R2					36.4081		34.0645	32.583
R3	35.6263	37.0947	32.9182	32.6093							35.0083	33.9977
R4
R5					37.1135	37.0803	33.3653	33.4428
FB1	30.1931	31.8284	34.1774	33.0632	30.3408	30.8548	33.2218	34.8215	31.0809	31.3092	36.1735	34.8483
FB2	29.6859	29.9769	33.4394	33.3358	29.6793	29.5121	33.7842	33.4984	30.5937	31.724	35.4658	32.669
FB3	31.0311	31.8906	34.7894	33.0877	29.5981	28.2464	34.698	32.6132	30.8439	30.4552	34.6187	33.5013
FB4	31.3446	31.6327	36.2866	31.9685	30.8472	31.3168	32.5986	33.5113	34.2966	35.4831	#DIV/0!	36.931
FB5	31.812	30.8745	34.0839	35.2538	32.1574	31.2729	34.369	35.1661	31.8984	31.916	35.2283	33.4008
MF1	30.4734	30.3941	31.6586	29.3867	31.0508	30.5455	32.4211	29.3362	30.0434	28.7458	31.975	28.9454
MF2	29.7313	30.6149	31.3624	29.6534	32.0651	33.8424	34.6428	30.627	31.7931	33.5086	34.8226	29.3767
MF3	31.4407	34.0527	33.0759	30.771	30.7766	31.3329	34.0127	31.3841	29.7853	29.0599	32.8963	30.188
MF4	30.0253	30.0419	31.9219	29.4055	31.7791	33.4202	34.7096	28.9859	28.948	29.5315	31.5352	27.2006
MF5	30.9795	30.0007	31.9273	29.112	32.8086	33.0909	34.067	29.8426	30.0712	30.8134	31.159	26.7663
YS1	21.4224	25.516	27.7741	24.6735	21.3934	25.1108	27.9325	24.7877	21.1776	26.2383	27.6886	23.3963
YS2	20.6976	24.9403	28.2732	24.2597	21.0765	25.5474	27.2857	25.1126	21.3294	26.9093	28.6468	23.7356
YS3	22.0334	25.2855	27.86	24.8296	21.7054	25.6554	26.7764	24.5051	22.1388	25.4857	28.3888	24.3694
YS4	20.451	22.5694	27.3179	24.0335	21.9418	26.6532	28.4848	23.4247	22.1457	26.2581	28.4037	24.6731
YS5	22.723	26.7979	28.9053	24.725	24.4406	28.7214	28.8757	27.8056
MS1	35.804	36.0067	36.5244	36.3101	33.9852	34.335			34.1771	34.358	34.6537
MS2	35.2861	35.4839			35.7437	35.5134	37.0205	36.9536	34.5993	34.6472
MS3	34.7283	35.6382	36.6367		35.3873	36.4204			34.9295	36.6297	35.9088	36.9404
MS4	35.2469	35.9839			33.9461	32.7661	38.3344	36.9685
MS5	35.8641	35.2579			35.518	33.7038	33.6808	38.1657

## Sheet: Efficientcy Pool1
Primer efficiency calculation
	01 dmaW			03 atp6			05 actG			04 tefA
CT	1	2	3	4	5	6	7	8	9	10	11	12
A	22.1775	21.9643	22.0346	23.7917	24.0469	23.8972	27.7214	27.9949	28.2144	25.4688	25.3275	25.3876
B	23.0981	23.0835	23.0198	24.9561	24.9337	24.9475	28.9035	29.0404	29.0014	26.5102	26.238	26.3724
C	24.3045	24.2794	24.0689	25.9236	25.941	25.84	29.6528	29.4661	30.2707	27.3878	27.3401	27.6046
D	25.5308	24.7718	25.0642	26.9786	26.7903	26.8744	31.1354	30.9701	30.4574	28.3866	28.2568	28.2527
E	26.5186	26.3953	26.2868	27.9703	27.902	27.9419	31.6619	31.9663	31.6244	29.6353	29.4363	29.343
F	27.5673	27.2684	26.9857	28.5065	29.2969		32.384	32.164		30.455	30.3882	30.2664
G	28.651	28.148	28.3424	30.0552	30.417	30.3914	33.7727	33.2984	32.7123	31.9308	30.981	31.1094
H	Undetermined	Undetermined	Undetermined	Undetermined	Undetermined	Undetermined	Undetermined	Undetermined	Undetermined	Undetermined	Undetermined	Undetermined
Average CT
log	cDNA conc.	01 dmaW	03 atp6	05 actG	04 tefA			Average Efficiency					Average R2
2.30103	200	22.0588	23.9119	27.9769	25.3947			01 dmaW	03 atp6	05 actG	04 tefA		01 dmaW	03 atp6	05 actG	04 tefA
2	100	23.0672	24.9458	28.9818	26.3735		Pool1	0.928126	0.949334	1.21598	1.00712		0.9989	0.9973	0.9953	0.9993
1.69897	50	24.2176	25.9015	29.7965	27.4442		Pool2	0.93199	0.973385	0.926178	1.00866		0.998	0.9974	0.9843	0.9964
1.39794	25	25.1223	26.8811	30.8543	28.2987		Pool3	0.916851	1.01292	1.10542	0.890837		0.9986	0.9964	0.9754	0.9704
1.09691	12.5	26.4002	27.9381	31.7509	29.4716		Average	92.5655	97.8545	108.253	96.8871		0.9985	0.997033	0.985	0.9887
0.79588	6.25	27.2738	28.9017	32.274	30.3699
0.49485	3.125	28.3805	30.2879	33.2611	31.3404
	01 dmaW	03 atp6	05 actG	04 tefA
Slope	-3.50711	-3.44963	-2.8938	-3.30499
Efficiency	0.928126	0.949334	1.21598	1.00712

## Sheet: Efficientcy Pool2
Primer efficiency calculation
	01 dmaW			03 atp6			05 actG			04 tefA
CT	1	2	3	4	5	6	7	8	9	10	11	12
A	22.9147	22.7356	22.6698	25.6171	25.6117	25.7547	28.9453	28.9663	28.4769	26.939	26.891	26.9224
B	23.8849	23.6527	23.5787	26.4237	26.5406	26.5199	29.6123	29.9381	29.5651	27.6136	27.7887	27.5517
C	24.782	24.9072	24.559	27.5654	27.4834	27.5184	30.857	30.6393	30.5971	28.5361	28.6933	28.6504
D	25.8683	25.5816	25.7227	28.5424	28.4797	28.4586	31.5991	31.7055	31.0992	29.3561	29.6395	29.5066
E	26.8681	26.7723	26.7081	29.6198	29.48	29.4602	32.1421	33.1278	33.1134	30.8477	30.6183	30.738
F	27.9365	27.8489	27.8061	30.9237	30.9206	30.6126	33.3041	33.1399	34.116	31.6314	31.9605	31.7043
G	29.4024	28.9642	29.0741	31.5454	31.6194	31.7245	35.6321	35.9348	34.7016	32.5833	32.9512	32.7083
H	Undetermined	Undetermined	Undetermined	Undetermined	Undetermined	Undetermined	Undetermined	Undetermined	Undetermined	Undetermined	Undetermined	Undetermined
Average CT
log	cDNA conc.	01 dmaW	03 atp6	05 actG	04 tefA
2.30103	200	22.7734	25.6612	28.7962	26.9175
2	100	23.7054	26.4947	29.7051	27.6513
1.69897	50	24.7494	27.5224	30.6978	28.6266
1.39794	25	25.7242	28.4935	31.4679	29.5007
1.09691	12.5	26.7828	29.52	32.7944	30.7346
0.79588	6.25	27.8638	30.819	33.52	31.7654
0.49485	3.125	29.1469	31.6298	35.4229	32.7476
	01 dmaW	03 atp6	05 actG	04 tefA
Slope	-3.49644	-3.3874	-3.51251	-3.30135
Efficiency	0.93199	0.973385	0.926178	1.00866

## Sheet: Efficientcy Pool3
Primer efficiency calculation
	01 dmaW			03 atp6			05 actG			04 tefA
CT	1	2	3	4	5	6	7	8	9	10	11	12
A	24.4165	24.2243	24.1947	26.5622	25.7072	25.7955	29.925	30.1701	30.0515	28.0972	28.2891	28.4072
B	25.2315	25.0989	25.4198	26.5827	26.7404	26.658	31.4787	30.8271	31.6701	29.309	29.1598	29.4821
C	26.3405	26.3029	25.9998	27.6553	27.6212	27.6712	32.0518	32.2569	32.7042	30.2079	30.1905	29.9795
D	27.3925	27.2814	27.0963	28.5295	28.6893	28.8017	33.1461	33.2279	33.3449	31.0627	30.8539	31.0333
E	28.4387	28.3478	28.4687	29.8974	29.7126	29.7031	33.3282	33.9734	32.6402	31.9301	31.9109	32.8712
F	29.947	29.3503	29.5335	30.6882	30.9185	30.7553	34.6764	35.6186	34.7504	32.7456	33.3597	32.772
G	30.7071	30.6642	30.3671	31.5698	31.9684	31.8935	35.4807	36.7582	35.6198	34.79	35.9536	35.1212
H	Undetermined	Undetermined	Undetermined	Undetermined	Undetermined	Undetermined	Undetermined	Undetermined	Undetermined	Undetermined	Undetermined	Undetermined
Average CT
log	cDNA conc.	01 dmaW	03 atp6	05 actG	04 tefA
2.30103	200	24.2785	26.0217	30.0489	28.2645
2	100	25.2501	26.6604	31.3253	29.3169
1.69897	50	26.2144	27.6493	32.3376	30.126
1.39794	25	27.2567	28.6735	33.2396	30.9833
1.09691	12.5	28.4184	29.7711	33.3139	32.2374
0.79588	6.25	29.6102	30.7873	35.0152	32.9591
0.49485	3.125	30.5795	31.8106	35.9529	35.2883
	01 dmaW	03 atp6	05 actG	04 tefA
Slope	-3.53872	-3.29136	-3.09272	-3.61462
Efficiency	0.916851	1.01292	1.10542	0.890837
